# Supplementary material for: Piezo2 protein: A novel regulator of tumor angiogenesis and hyperpermeability
Source: PubMed Central journal article supplement (PMC5190124; doi:10.18632/oncotarget.10134), 2016-06-17
Supplement: oncotarget-07-44630-s001.pdf [file oncotarget-07-44630-s001.pdf]

## Piezo2 protein: A novel regulator of tumor angiogenesis and hyperpermeability

### SUPPLEMENTARY FIGURES

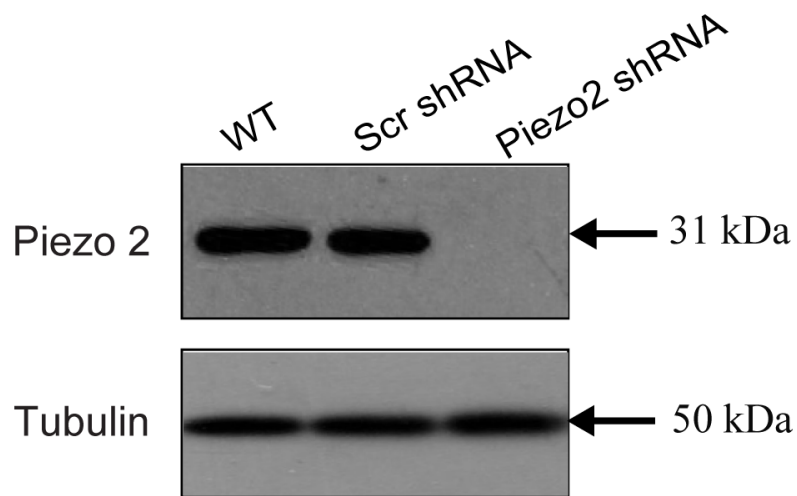

**Supplementary Figure S1: Detection of Piezo 2 expression by western blots.** GL261 glioma cells were transfected with scrambled shRNA (Scr), Piezo2 shRNA, or left untreated (WT) for 48 h, and then injected subcutaneously into the right flank of 8-week-old female nude C57BL/6 mice. Two weeks after injection, tumor tissue was harvested and immediately frozen in liquid nitrogen for western blot analysis of Piezo2 expression. Tubulin was detected as the internal control. n=6 animals per group. Data was from three independent experiments.

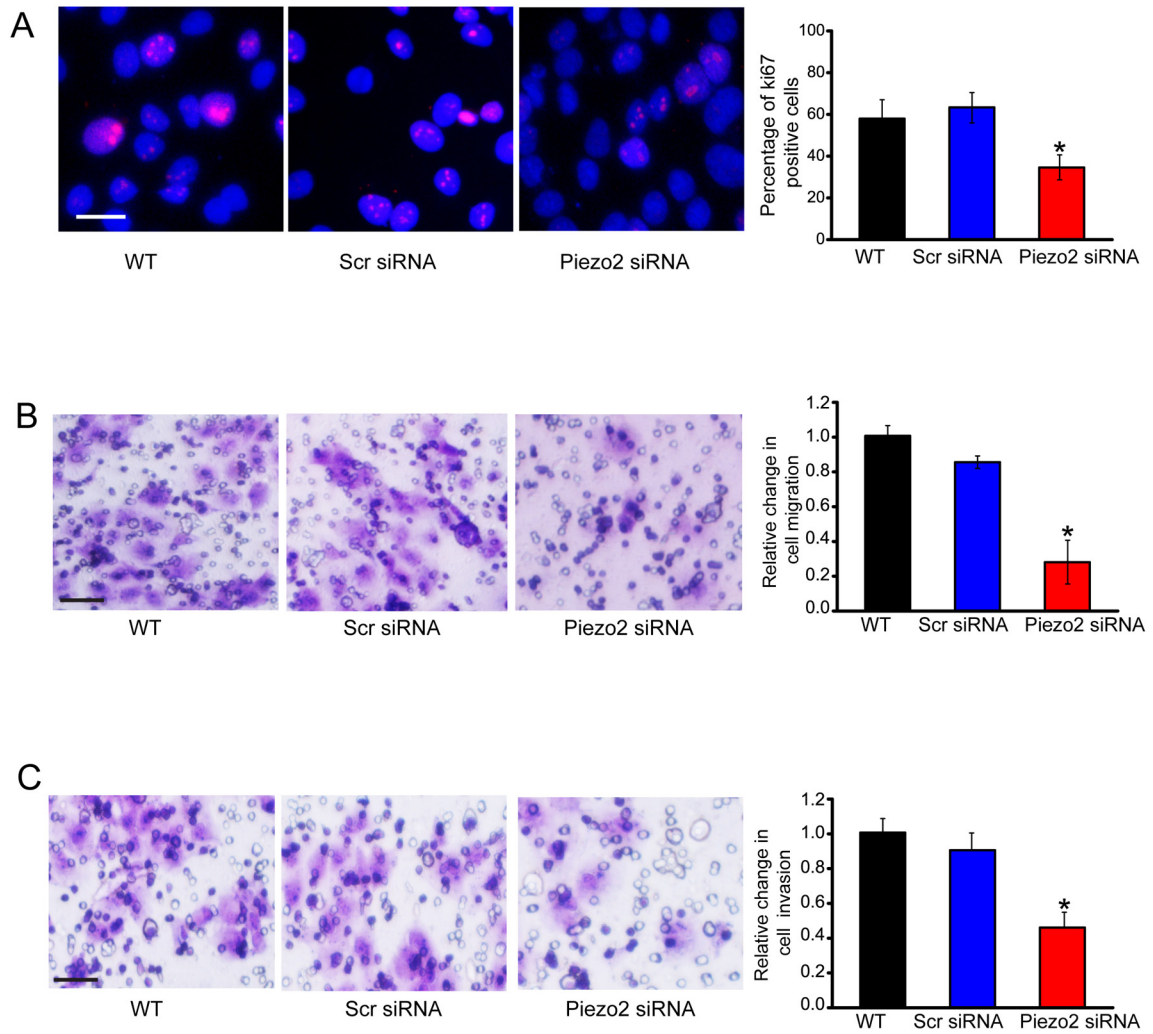

**Supplementary Figure S2: Effect of Piezo2 knockdown in HUVECs on tumor cell function.** HUVECs were transfected with scrambled siRNA (Scr), Piezo2 siRNA, or left untreated (WT), and then co-cultured with GL261 glioma cells for 48 h. Ki67 staining was conducted to detect tumor cell proliferation (n=4, A) Scale bar, 20  $\mu$ m. Transwell assays were conducted to detect tumor cell migration and invasion (n=4, B and C). Scale bar, 50  $\mu$ m. Data was from three independent experiments.

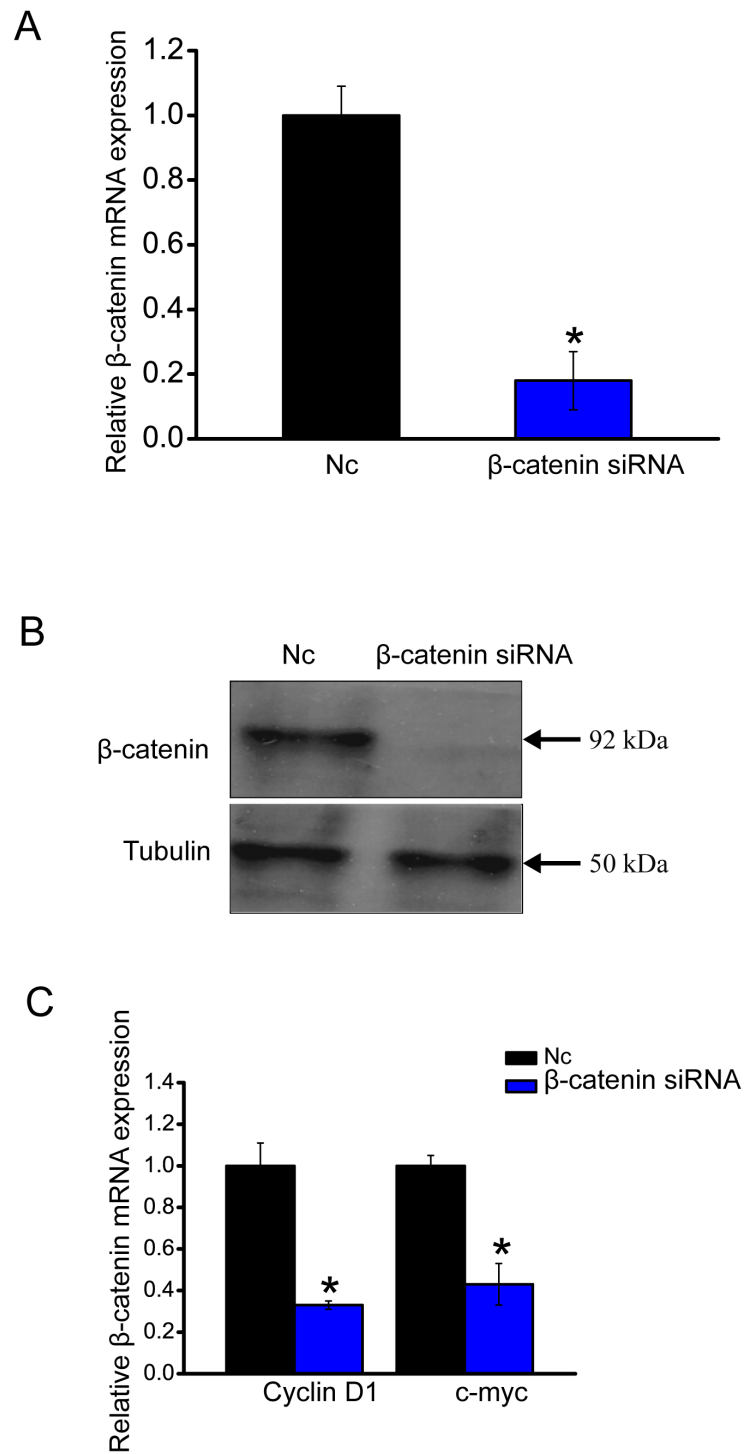

**Supplementary Figure S3: Knockdown of  $\beta$ -catenin in HUVECs.** HUVECs were transfected with  $\beta$ -catenin siRNA (KD) or scrambled siRNA (NC) for 24 h.  $\beta$ -catenin expression was determined by qRT-PCR and western blot (A and B). In addition, transcription of  $\beta$ -catenin target gene, cyclin D1 and c-Myc, was detected by qRT-PCR to confirm the efficacy of  $\beta$ -catenin knockdown in HUVECs (n = 4). \* $P < 0.05$ . Data was from three independent experiments.

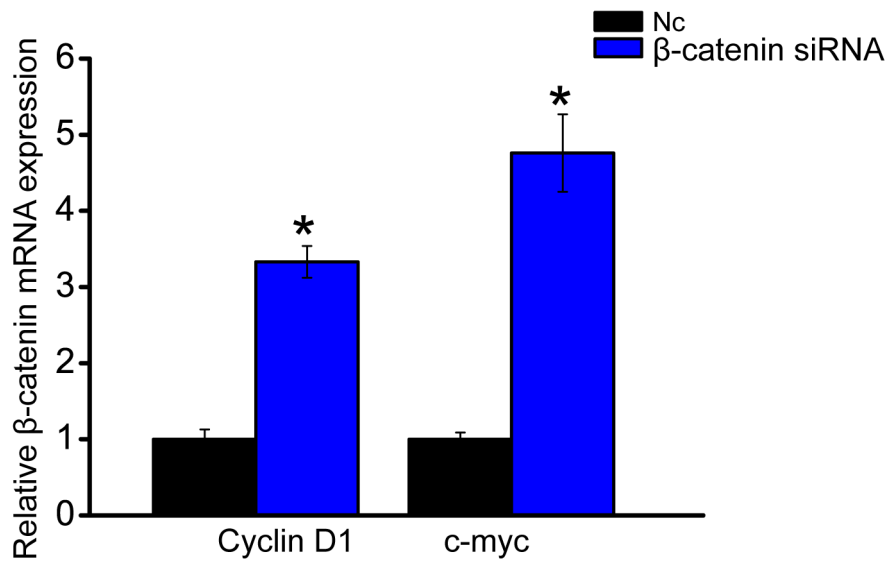

**Supplementary Figure S4: Functional analysis of axin 2 knockdown in HUVECs by detecting  $\beta$ -catenin target gene expression.** HUVECs were transfected with axin 2 siRNA (KD) or scrambled siRNA (NC). After cultivation for 24 h, the expression levels of cyclin D1 and c-Myc were detected using qRT-PCRs (n = 4). Data was from three independent experiments.

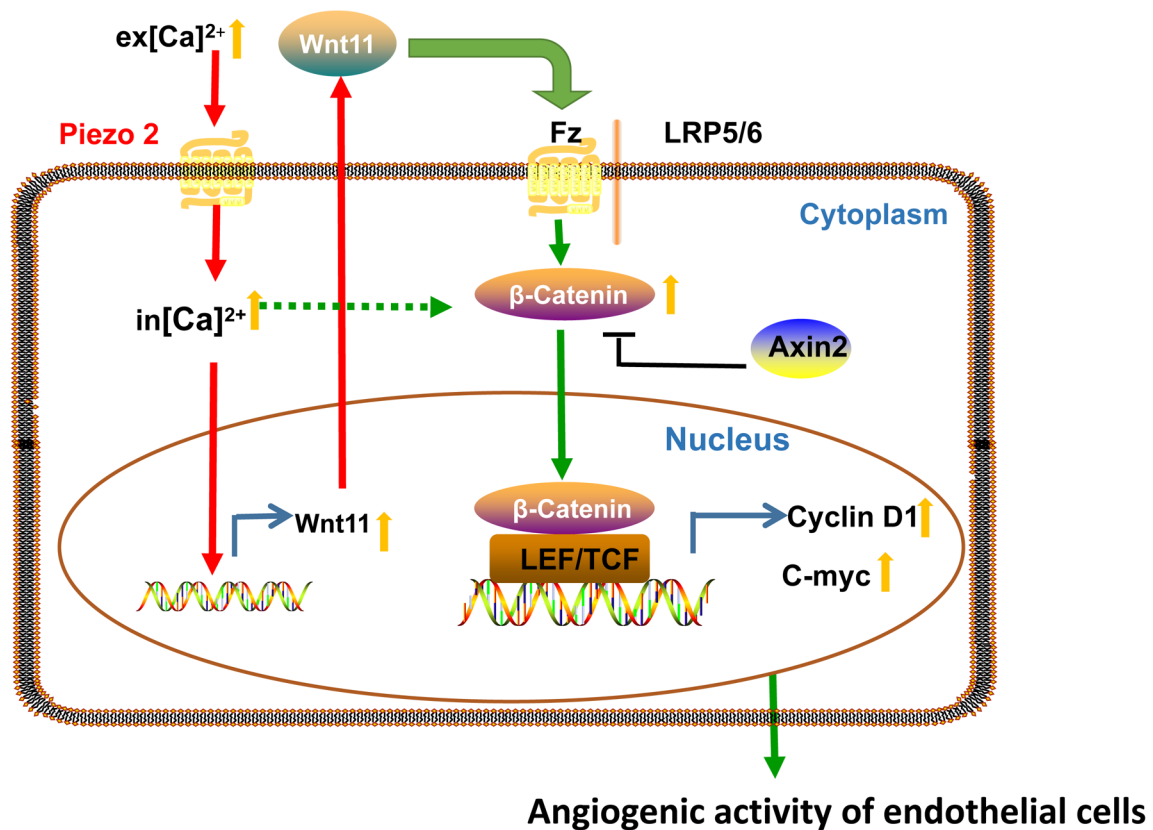

**Supplementary Figure S5: Proposed model for Piezo2/Wnt11/β-catenin signaling in the regulation of angiogenic activity of endothelial cells.** Elevated levels of extracellular calcium concentration ( $ex[Ca^{2+}]$ ) stimulate intracellular signaling through Piezo2. This leads to an increase in free intracellular calcium ( $in[Ca^{2+}]$ ). As a consequence, the expression and secretion of Wnt11 are up-regulated. Wnt11 then binds to members of the Frizzled (Fz) family of receptors and low-density lipoprotein receptor-related protein (LRP) 5/6 on the cell surface, thus activating the canonical Wnt/β-catenin signaling pathway through augmentation of β-catenin in endothelial cells. Improved interaction of nuclear β-catenin with lymphoid-enhancer-binding factor-1/T-cell factor-1 (LEF/TCF) transcription factors then leads to the up-regulation of typical target genes such as cyclin D1 and c-Myc, which regulates the angiogenic activity of endothelial cells.
